# Supplementary material for: The anomalous halogen bonding interactions between chlorine and bromine with water in clathrate hydrates
Source: Royal Society of Chemistry journal article supplement (doi:10.1039/c7fd00064b), 2017-01-01
Supplement: c7fd00064b2.pdf [file c7fd00064b2.pdf]

**Supporting Information for:**

**The nature of halogen bonding of Cl<sub>2</sub> and Br<sub>2</sub> with water in solid  
clathrate hydrates**

Hana Dureckova,<sup>a</sup> Tom K. Woo,<sup>a</sup> Konstantin A. Udachin, John A. Ripmeester,<sup>b,c</sup> and Saman  
Alavi,<sup>a,b,c</sup>

<sup>a</sup> *Department of Chemistry, University of Ottawa, Ottawa, Ontario K1N 6N5 Canada*

<sup>b</sup> *National Research Council Canada, 100 Sussex Drive, Ottawa, Ontario K1A 0R6 Canada*

<sup>c</sup> *Department of Chemical and Biological Engineering, University of British Columbia,  
Vancouver, British Columbia V6T 1Z3 Canada*

Three zip files with Cartesian coordinates of clathrate hydrate cages with guests are included.

These are:

1) **Cl<sub>2</sub> CS-I Hydrate cages.rar**

Cartesian coordinates for cages and Cl<sub>2</sub> guest positions from symmetry distinct positions from the X-ray diffraction data.

2) **Br<sub>2</sub> TS-I Hydrate cages.rar**

Cartesian coordinates for cages and Br<sub>2</sub> guest positions from symmetry distinct positions from the X-ray diffraction data.

3) **Cages for NBO analysis.rar**

Cartesian coordinates for cages and guest positions from ab initio optimization of the guests in the cages.

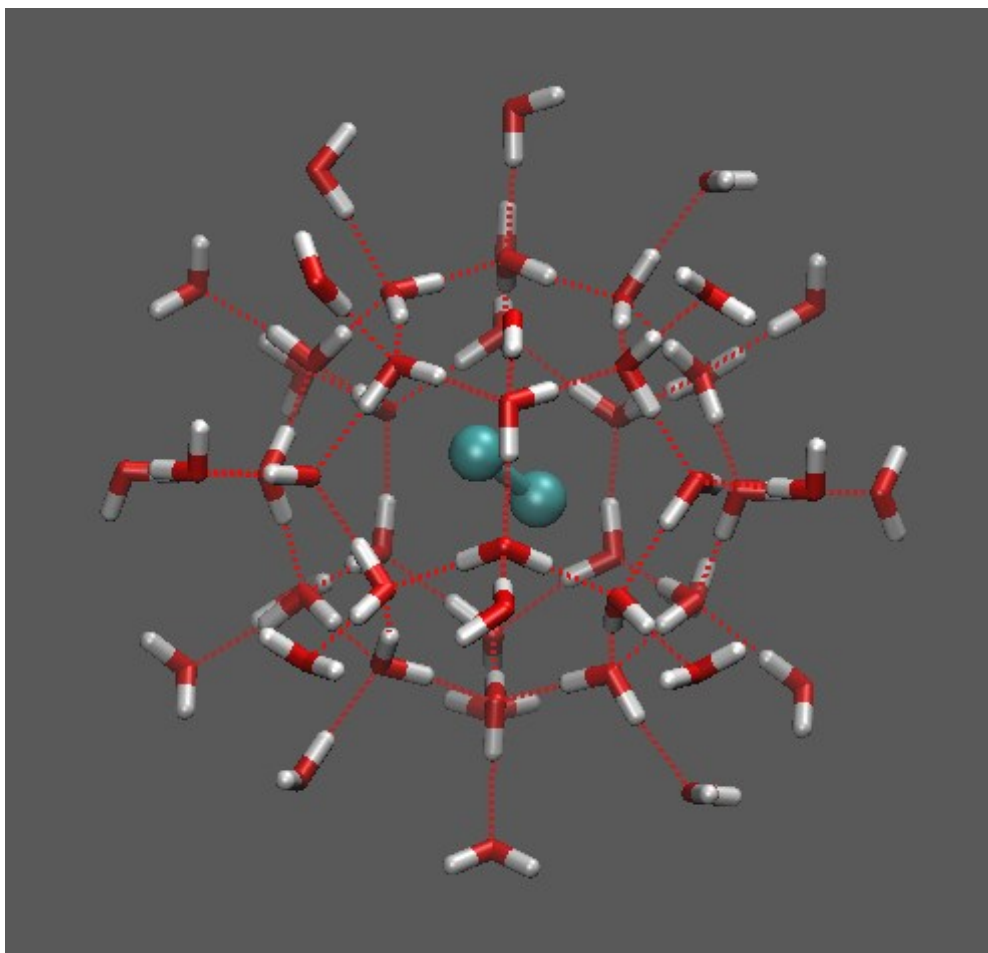

**Figure S1.** The configuration of the D cage with 20 shell water molecules extracted from the CS-I clathrate hydrate crystal structure with proton positions assigned to satisfy the ice rules.

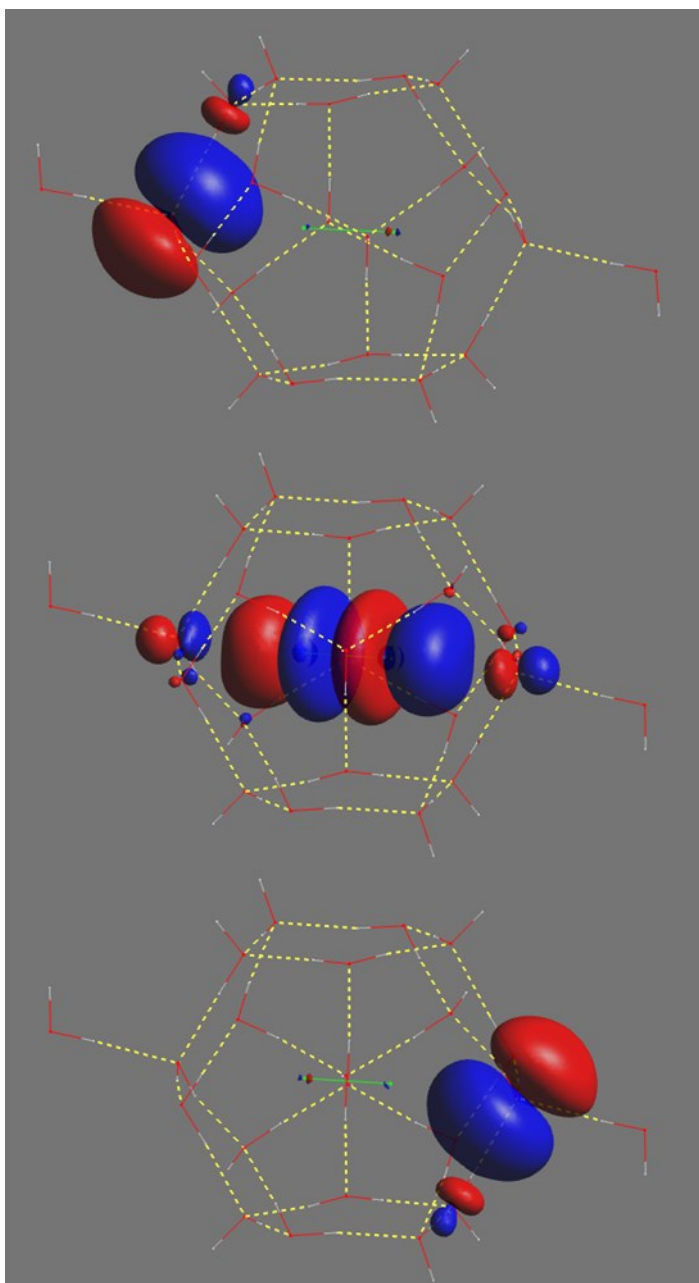

**Figure S2.** An alternative representation of the  $\sigma^*$  antibonding orbital on  $\text{Cl}_2$  and the two ILPs on the water molecule closest to the guest atoms.

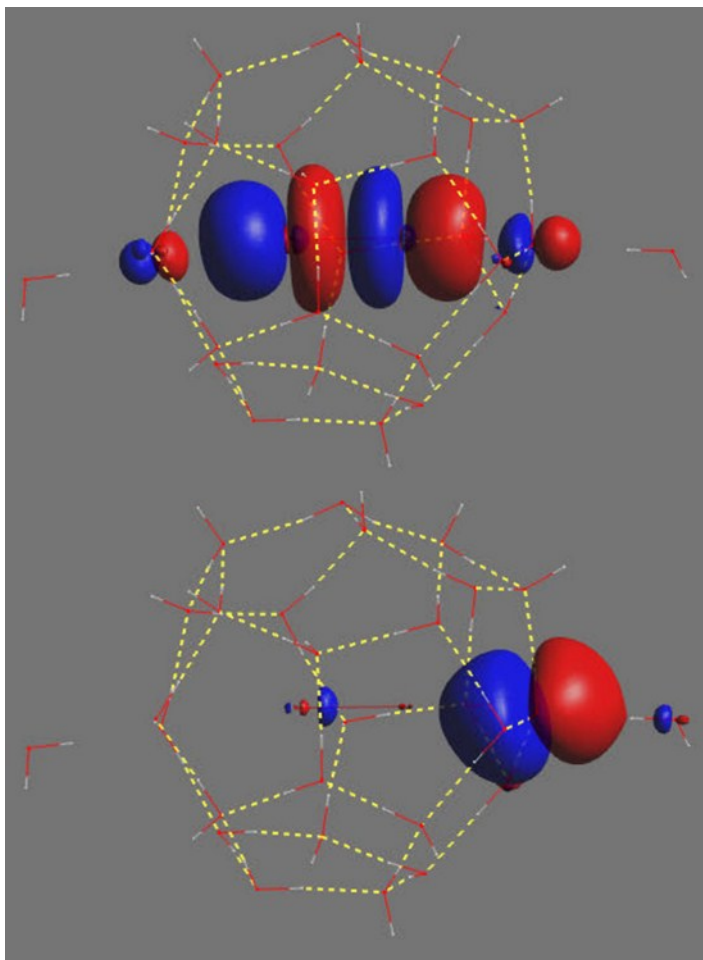

**Figure S3.** An alternative representation of the  $\sigma^*$  antibonding orbital on  $\text{Cl}_2$  and the one ELPs on the water molecule closest to a guest atom.
